# Supplementary material for: Surface polymerization of (3,4-ethylenedioxythiophene) probed by in situ scanning tunneling microscopy on Au(111) in ionic liquids
Source: Royal Society of Chemistry journal article supplement (doi:10.1039/c0nr00579g), 2010-11-09
Supplement: c0nr00579g.pdf [file c0nr00579g.pdf]

**Supporting Information for:**

**Surface Polymerization of (3,4-ethylenedioxythiophene) Probed by in situ Scanning Tunneling Microscopy on Au (111) in Ionic liquids**

Shahzada Ahmad<sup>1\*</sup>, Timo Carstens<sup>2</sup>, Rüdiger Berger<sup>1</sup>, Hans-Jürgen Butt<sup>1</sup>, Frank Endres<sup>2</sup>

<sup>1</sup>Max Planck Institute for Polymer Research, Ackermannweg 10

D-55128 Mainz, Germany

<sup>2</sup>Institute of Particle Technology, Clausthal University of Technology,

Arnold-Sommerfeld-Strasse 6, 38678 Clausthal-Zellerfeld, Germany

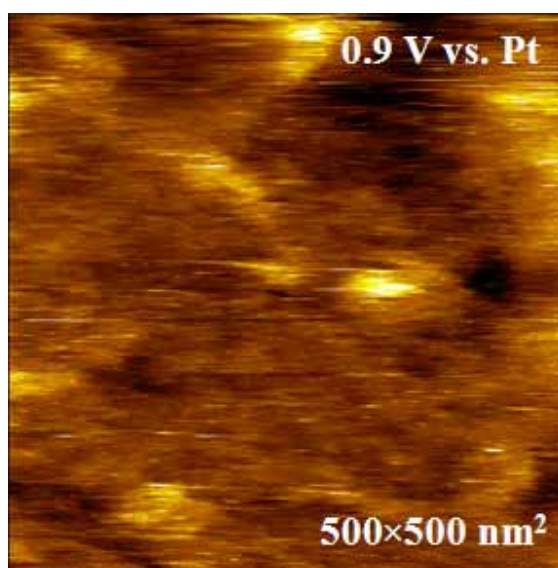

Figure S1: In situ STM image of PEDOT obtained in [HMIm]FAP at +0.9V vs. Pt-quasi-reference electrode. The image illustrates fully covered surface with PEDOT and that it can not be probed further and subsequently the STM tip crashes.

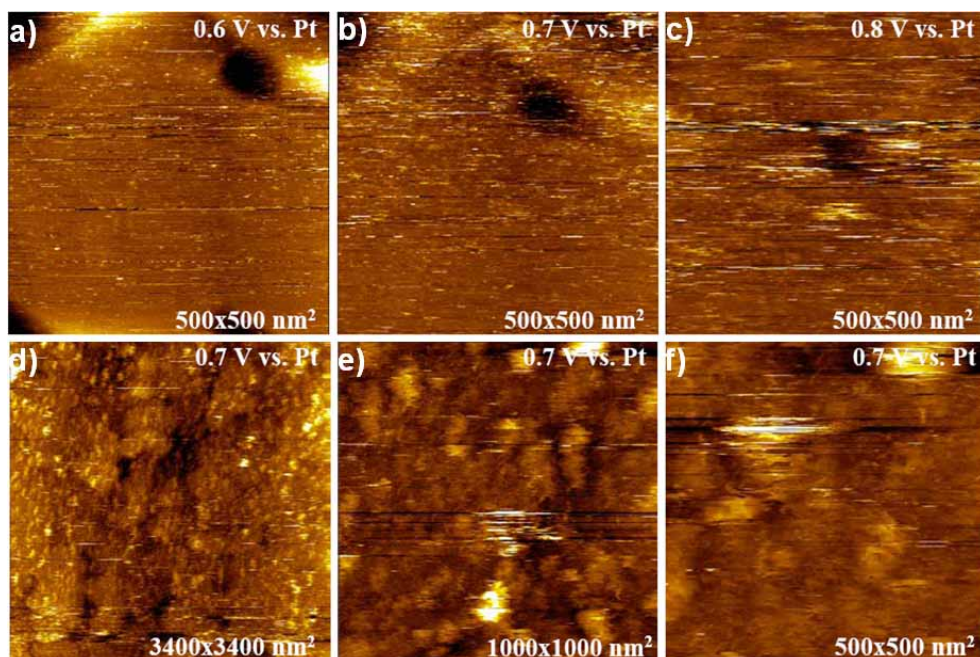

**Figure S2:** In situ growth of PEDOT as observed from STM on the application of different electrode potential using [EMIm]TFSF ionic liquids.

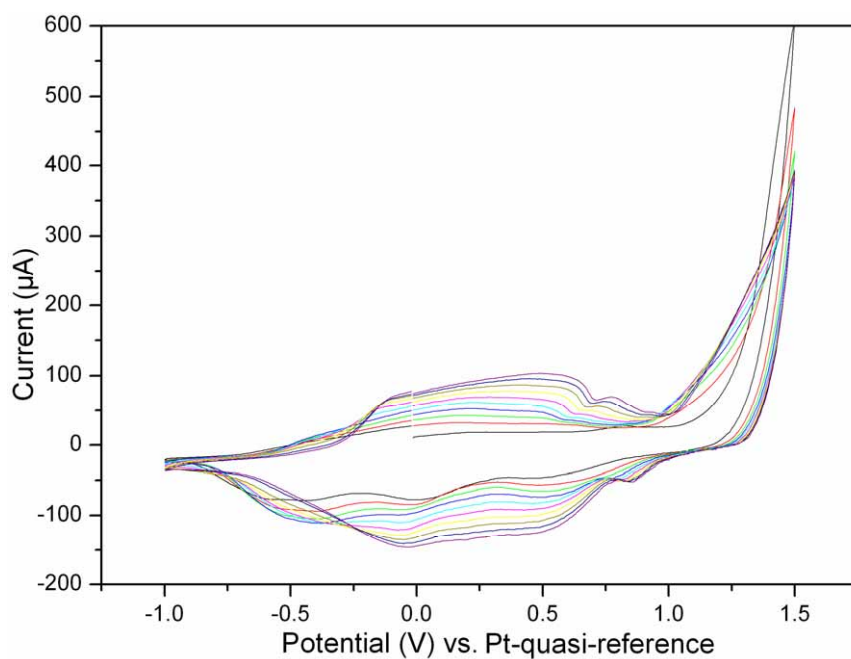

**Figure S3:** Growth profile of PEDOT recorded at 20mV/sec on Au electrode in [EMIm]TFSF containing 0.01 M EDOT.

### Redox behavior of PEDOT in [HMIm]FAP

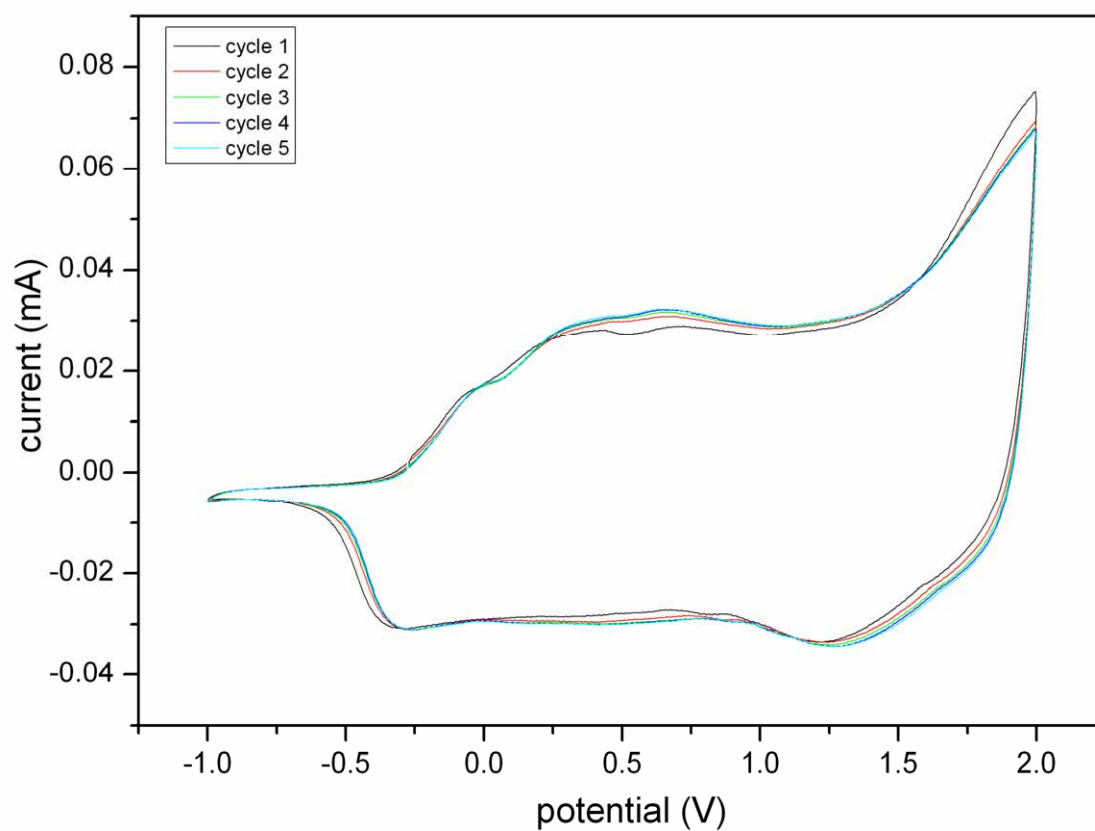

Figure S4: Cyclic voltammograms of PEDOT in [HMIm]FAP on Au electrode at a scan rate of 20 mV/sec in a range of -1 to +2 V. The voltammograms illustrates reproducibility of the synthesized PEDOT with high catalytic activity.

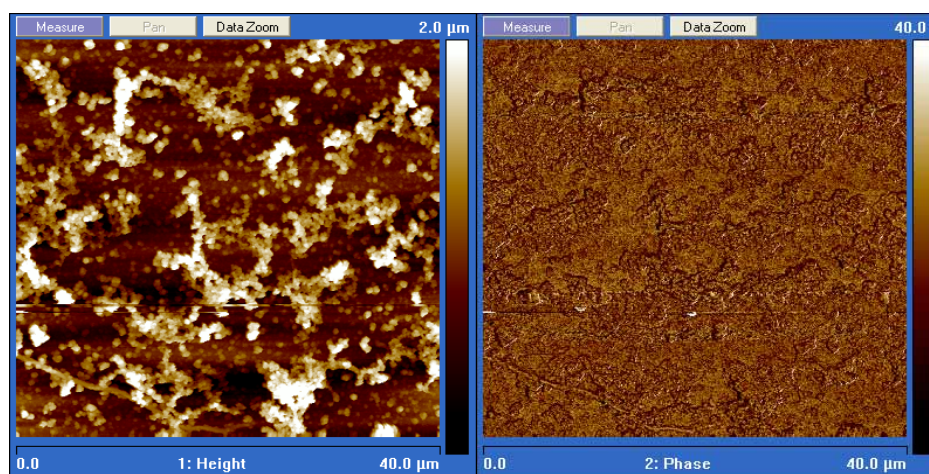

Figure S5: SFM microscopy, topography image (left) and phase (right) at a larger scale, illustrating the hierarchical growth of PEDOT in [HMIIm]FAP.
